# Supplementary material
Source: Research Square preprint supplement (doi:10.21203/rs.3.rs-9479527/v1)

# Supplement Figure 1

A

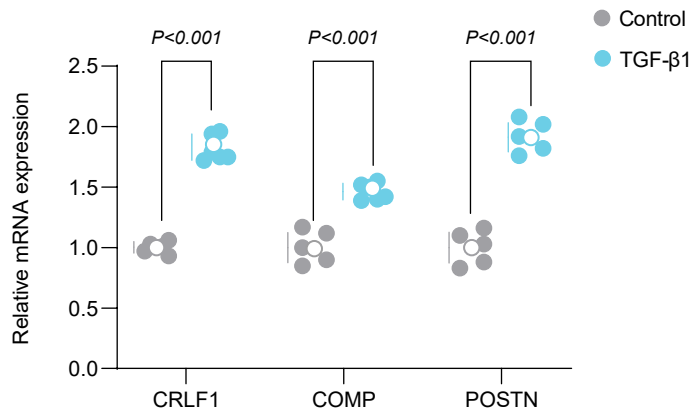

B

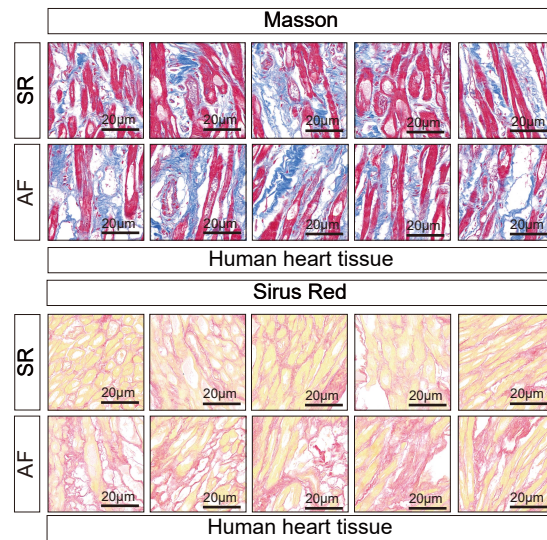

C

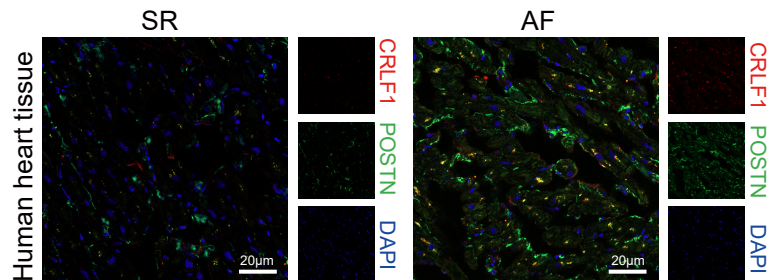

D

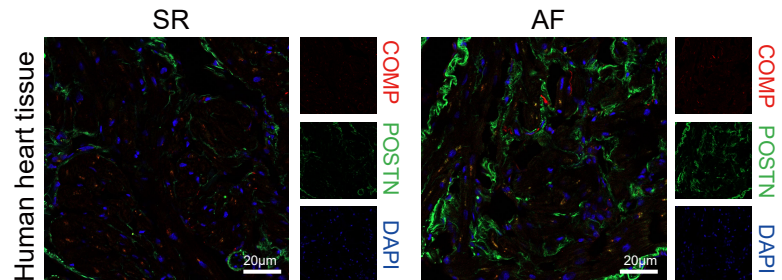

# Supplement Figure 2

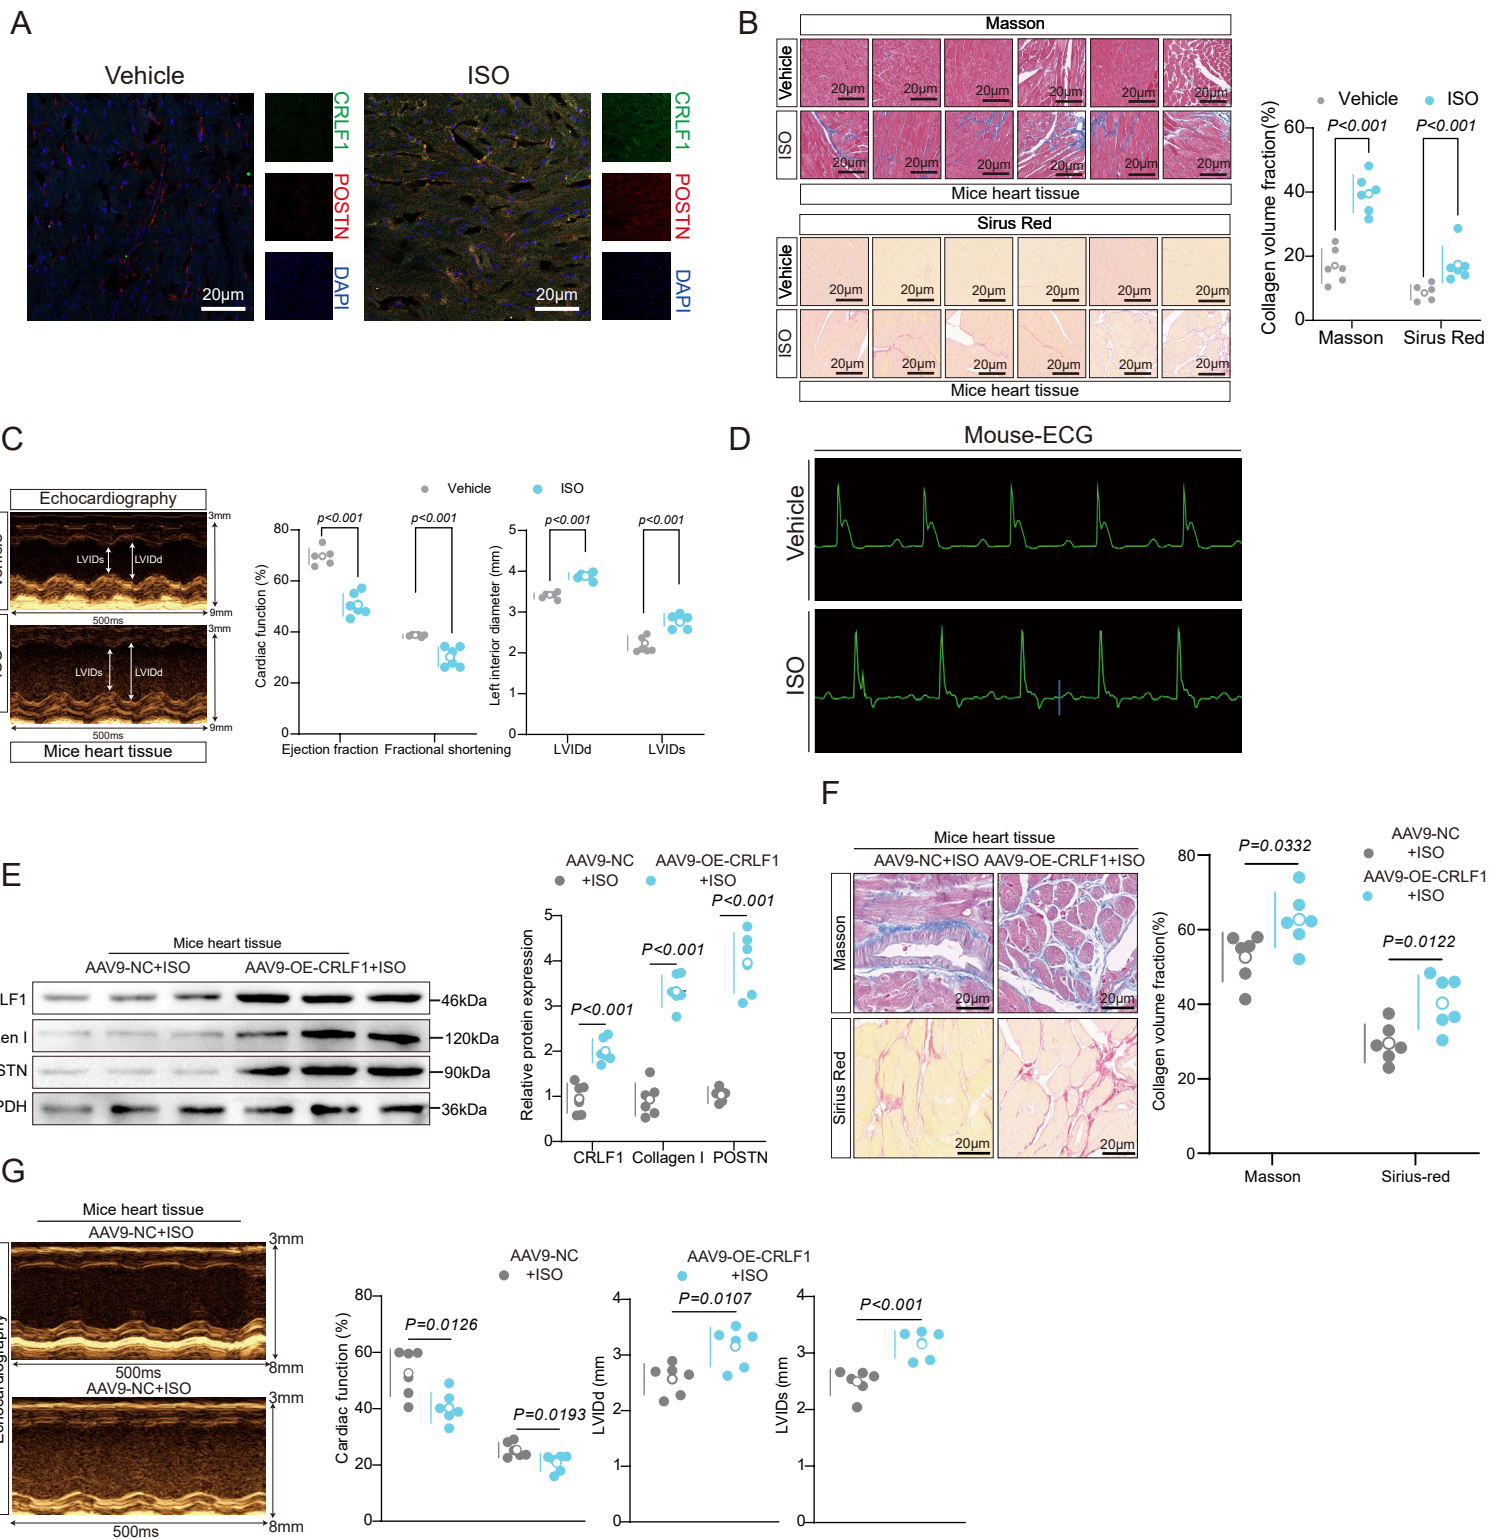

# Supplement Figure 3

A

| Protein     | The Relative level in NC Group | The Relative level in OE Group | log <sub>2</sub> (Fold Change) | P value |
|-------------|--------------------------------|--------------------------------|--------------------------------|---------|
| GBP1        | 0.71                           | 0.08                           | -3.17                          | 0.47    |
| GBP2        | 4.39                           | 11.25                          | 1.36                           | 0.03    |
| GBP3        | 0.92                           | 9.09                           | 3.31                           | 1.0E-3  |
| GBP5        | 2.0E-4                         | 0.30                           | 10.55                          | 0.02    |
| GBP6        | 0.03                           | 0.63                           | 4.45                           | 0.14    |
| GBP7        | 0.53                           | 3.51                           | 2.73                           | 2.0E-4  |
| GBP8        | 2.0E-4                         | 0.01                           | 6.06                           | 0.42    |
| <b>GBP9</b> | 2.0E-4                         | 1.11                           | 12.42                          | 0.01    |

B

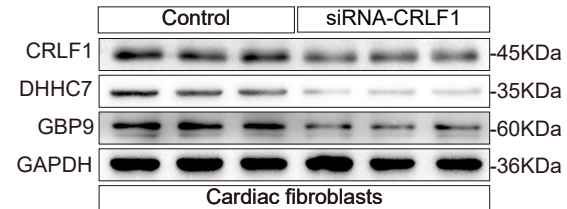

C

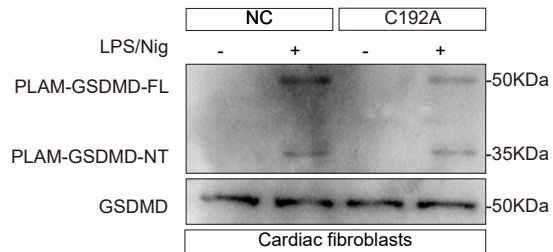

D

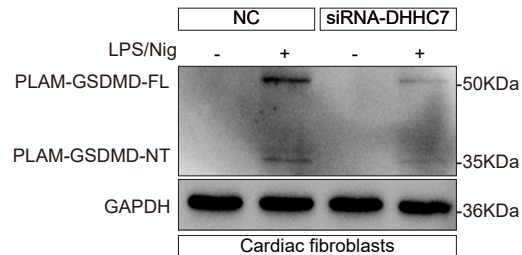

E

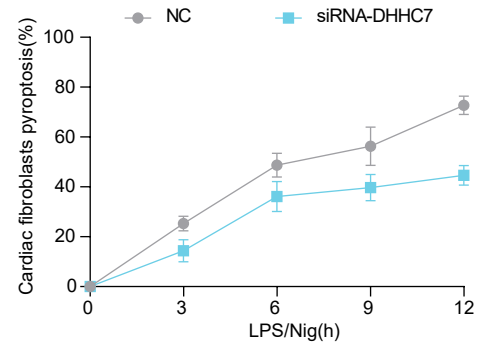

# Supplement Figure 4

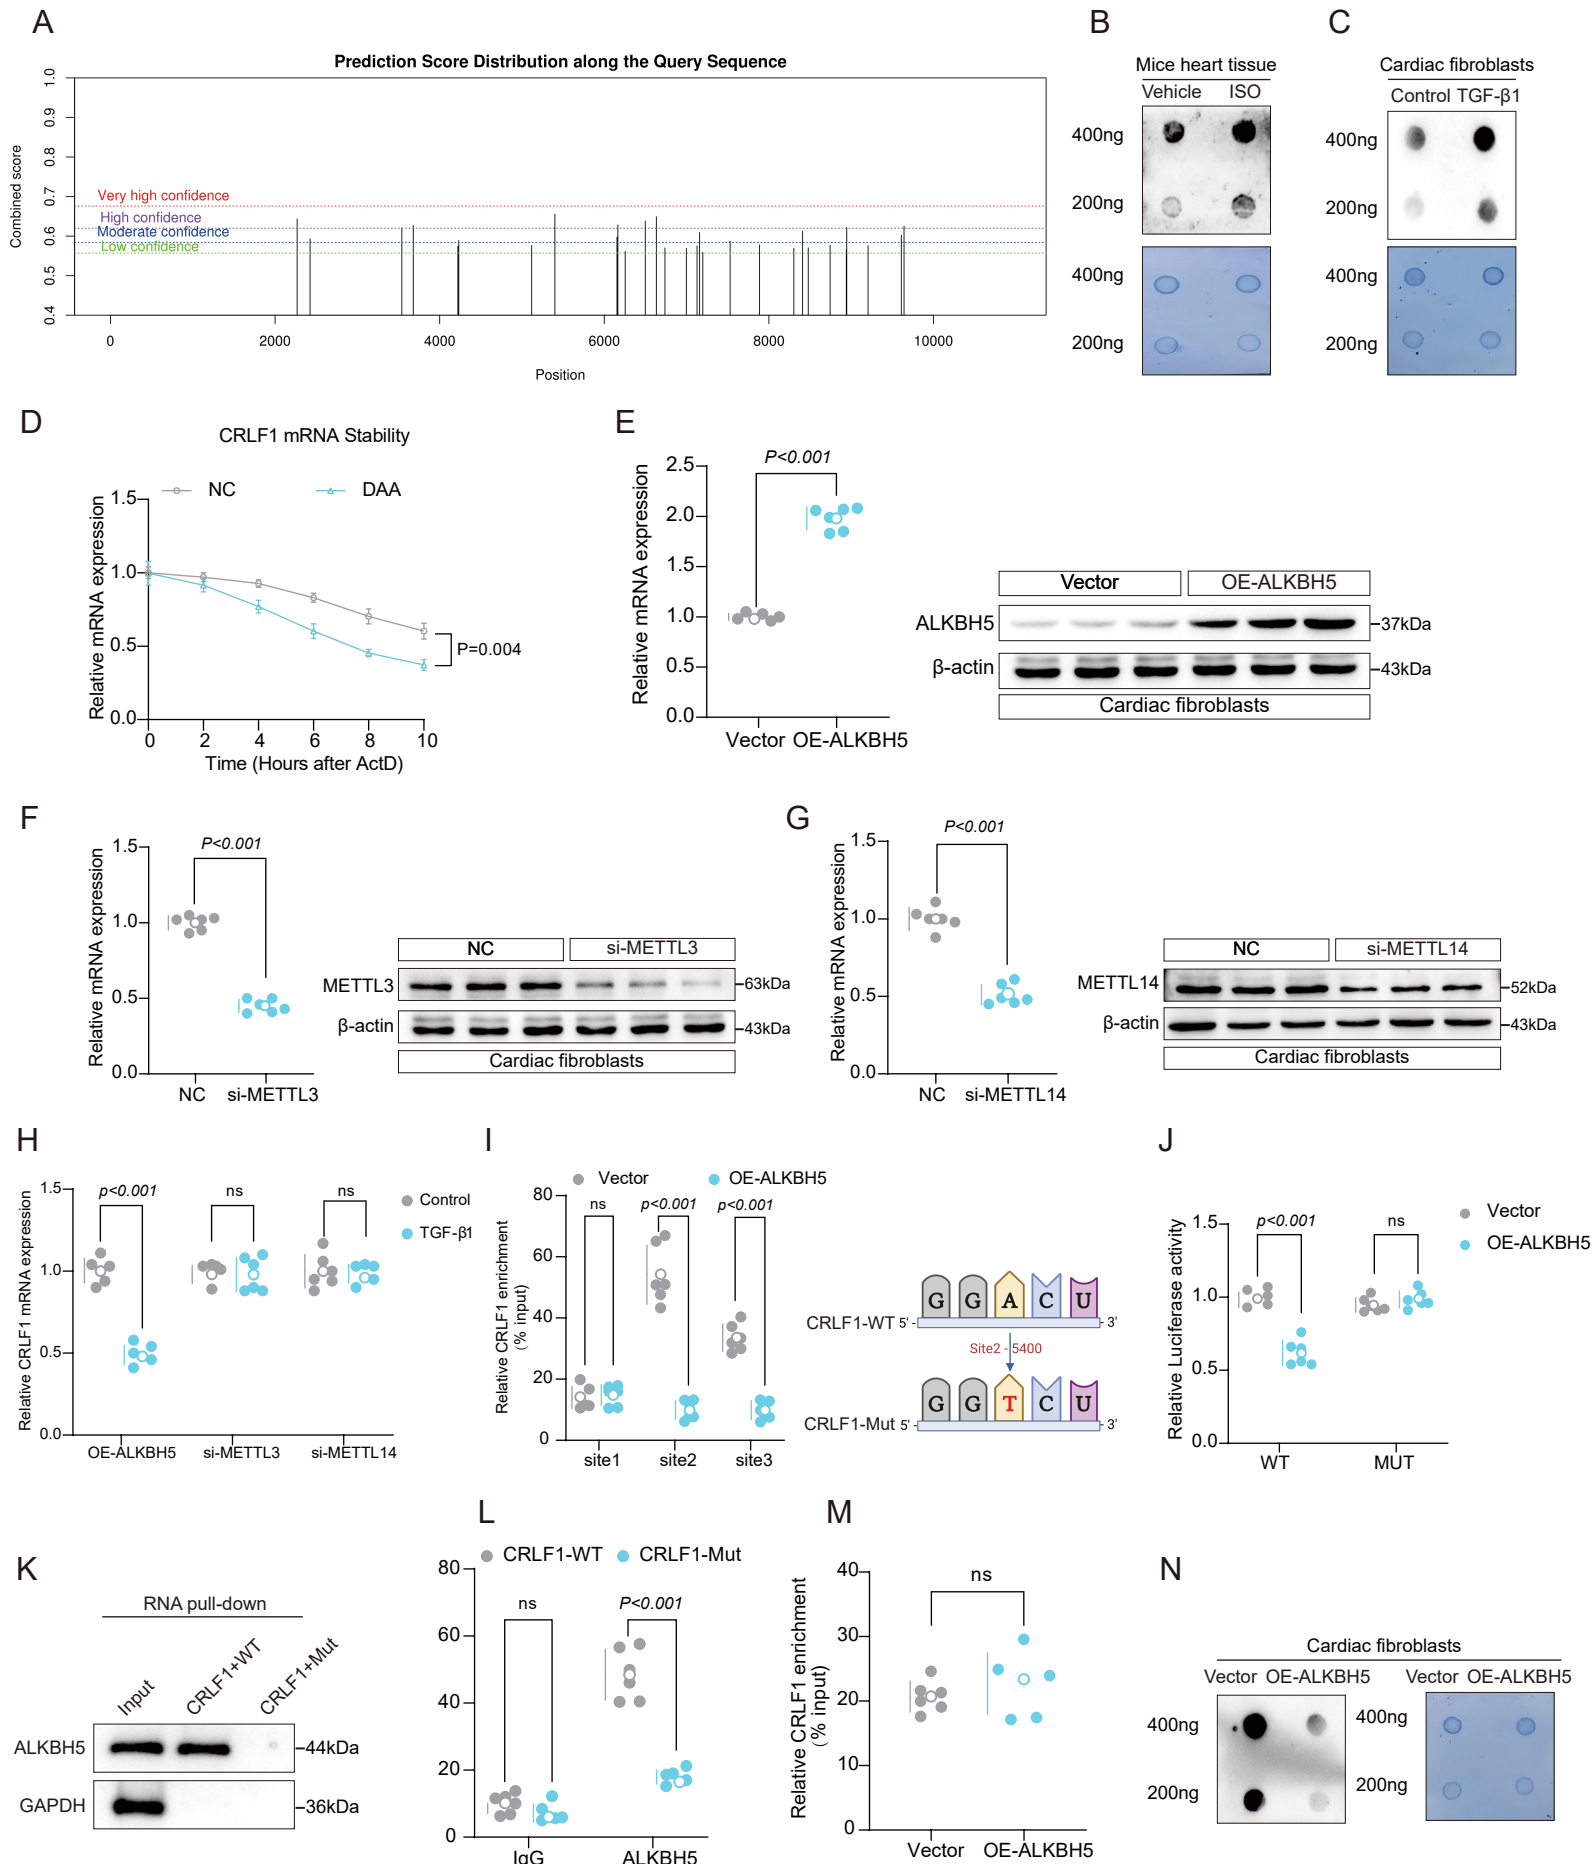

# Supplement Figure 5

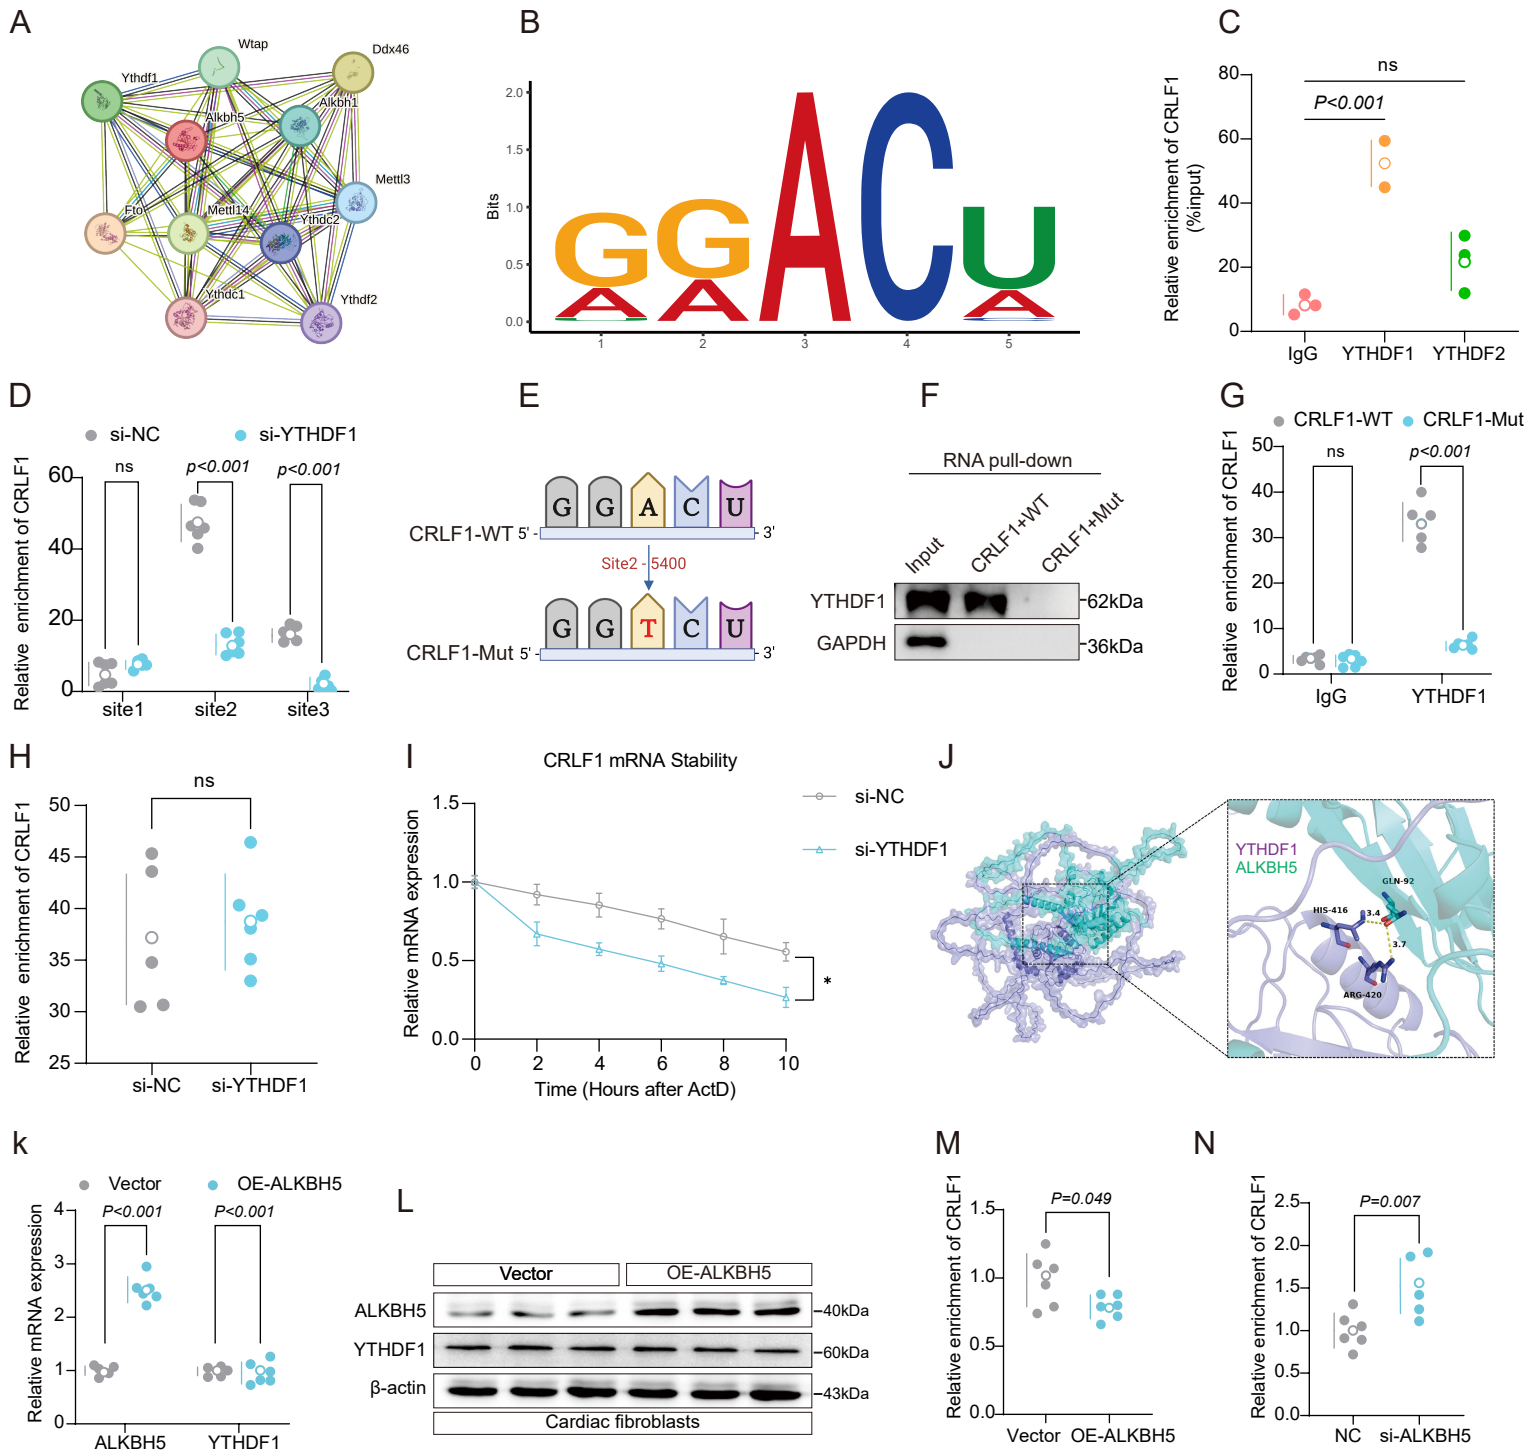

# Supplement Figure 6

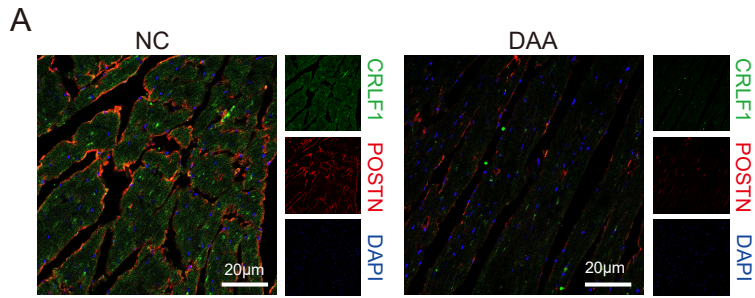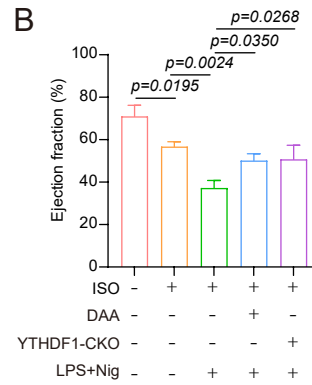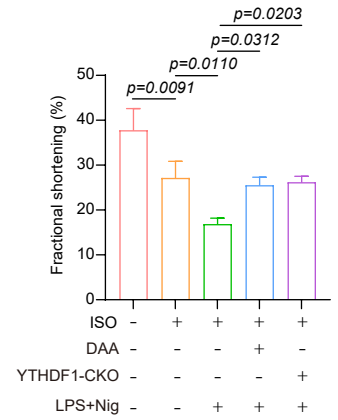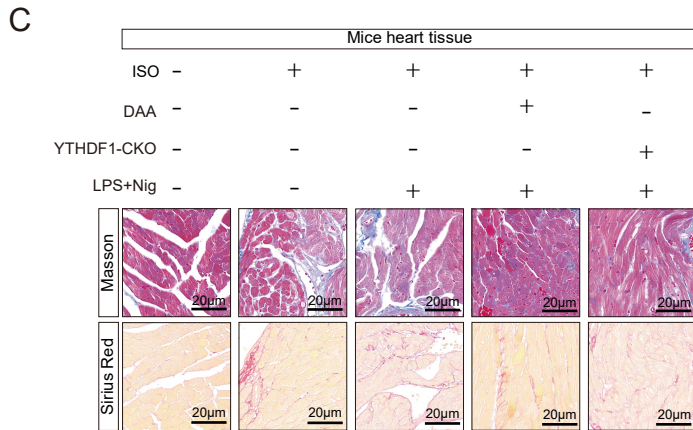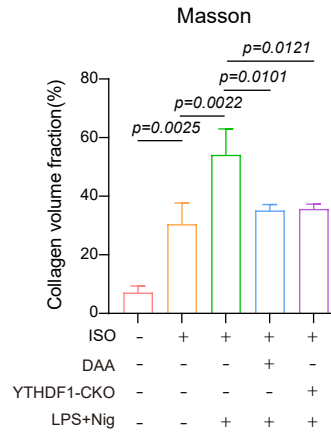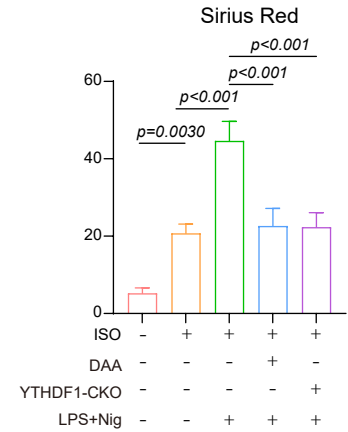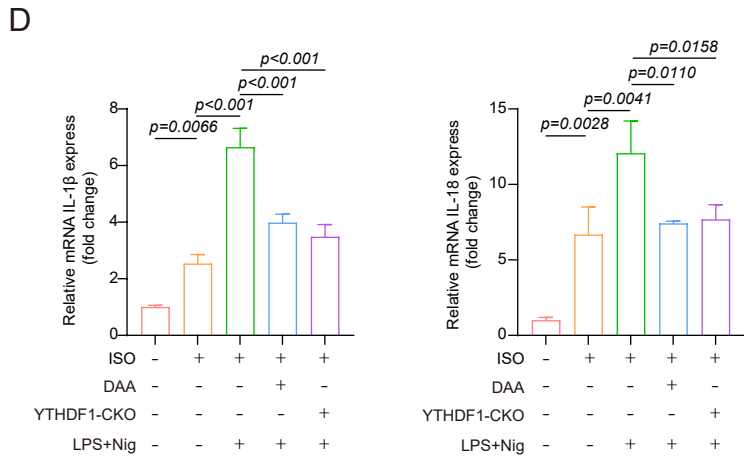

Supplement: Supplementary file 4 [file d8175453665b2e32f4600922.pdf]
