# Supplementary material
Source: Research Square preprint supplement (doi:10.21203/rs.3.rs-9479527/v1)
Supplement: Supplementary file 2 [file b1c7e7b62688ef8e899ee3f7.pdf]

# Figure 1E

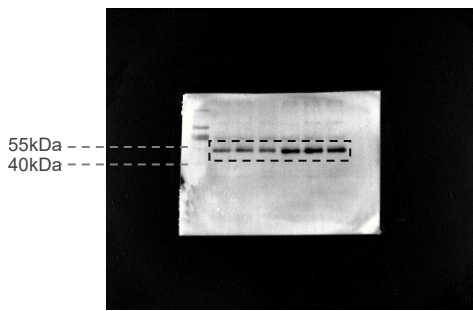

CRLF1

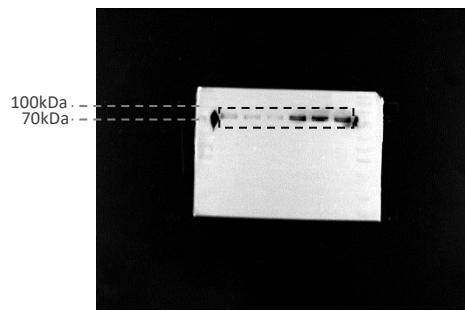

COMP

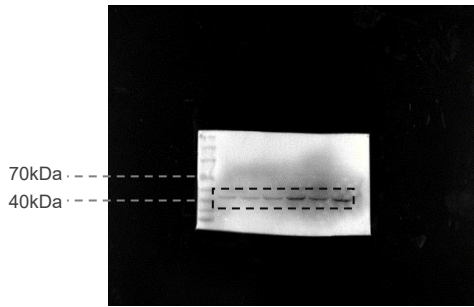

LRRN3

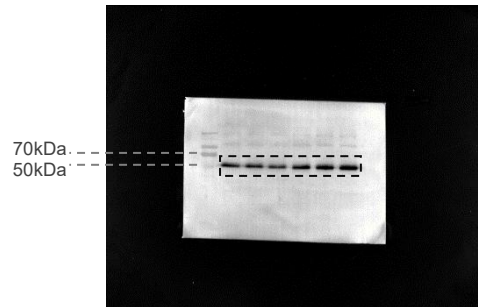

TLL2

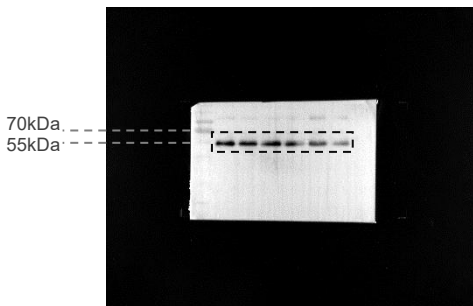

ANGPTL2

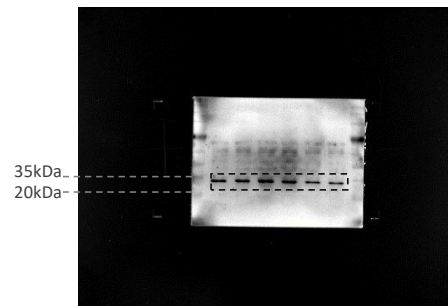

CSRP3

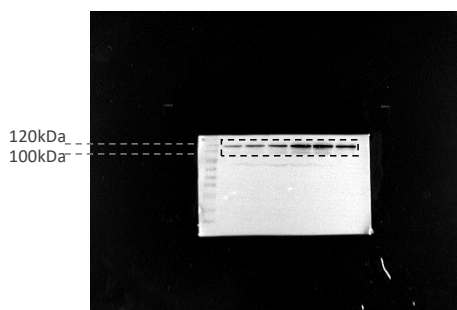

Collagen I

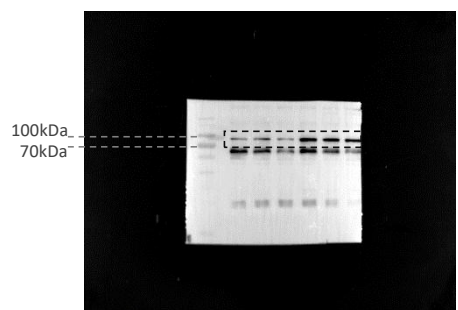

POSTN

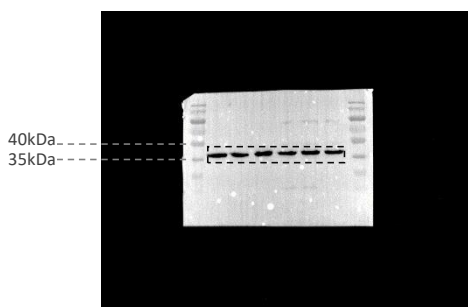

GAPDH

**Figure 1G**

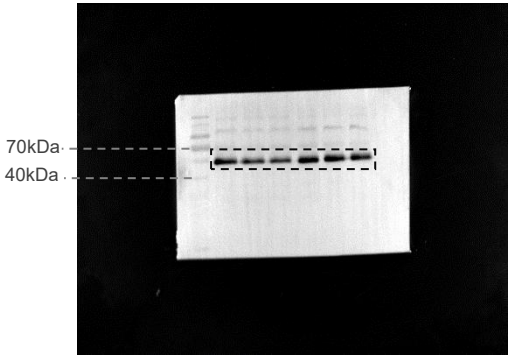

CRLF1

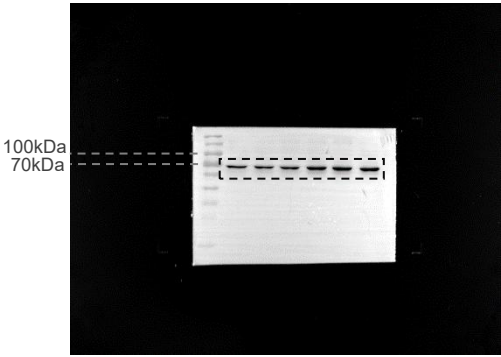

COMP

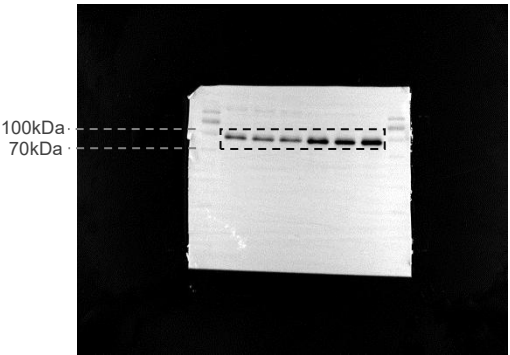

POSTN

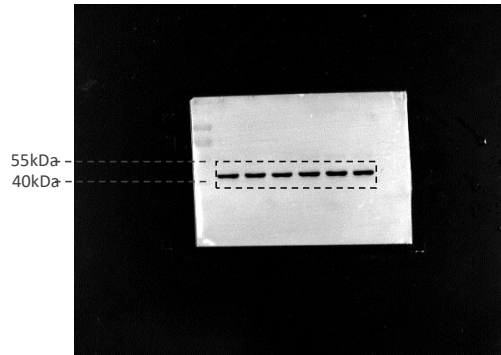

$\beta$ -actin

**Figure 2B**

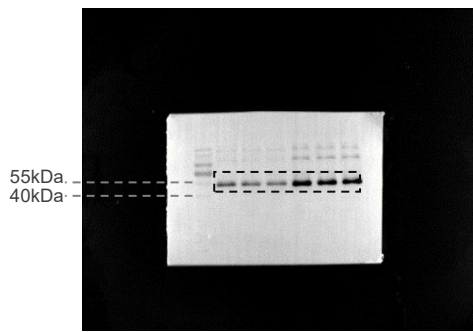

CRLF1

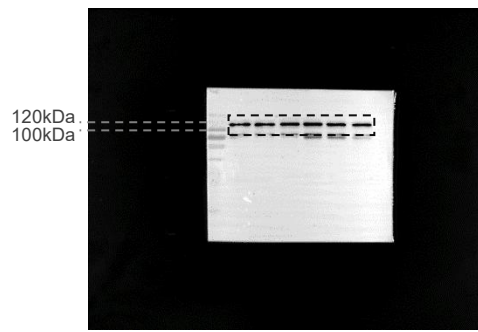

Collagen I

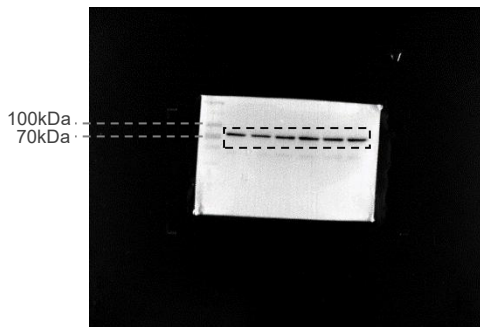

POSTN

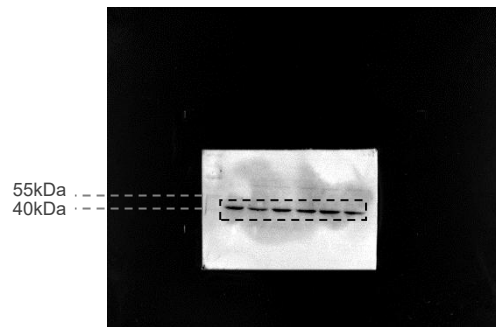

$\beta$ -actin

**Figure 2H**

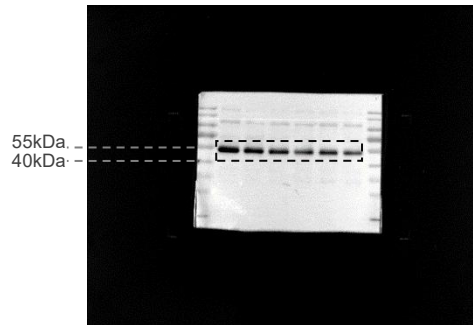

CRLF1

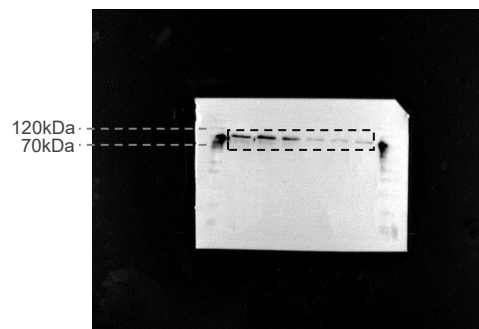

Collagen I

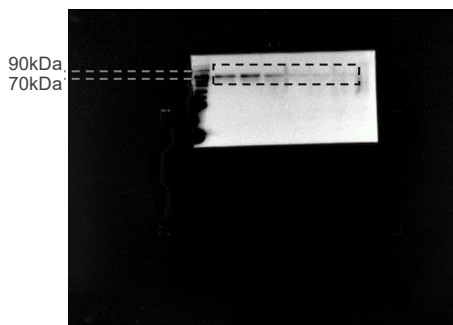

POSTN

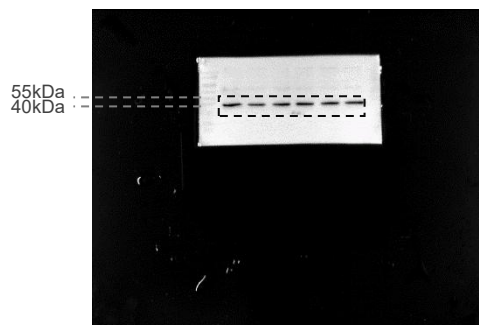

$\beta$ -actin

**Figure 3B**

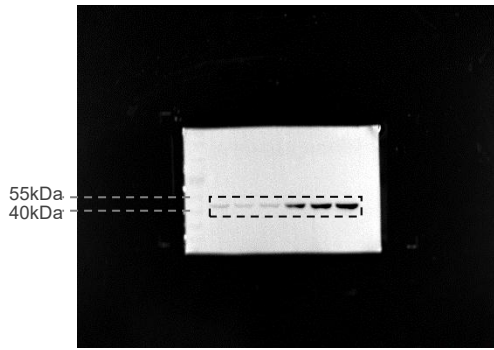

CRLF1

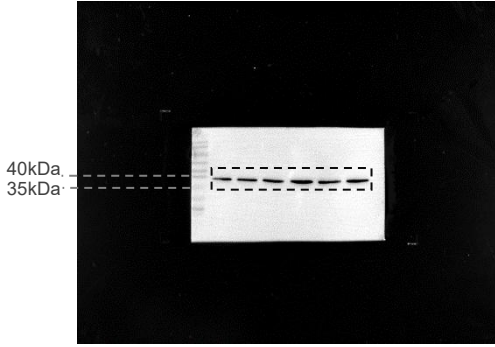

DHHC7

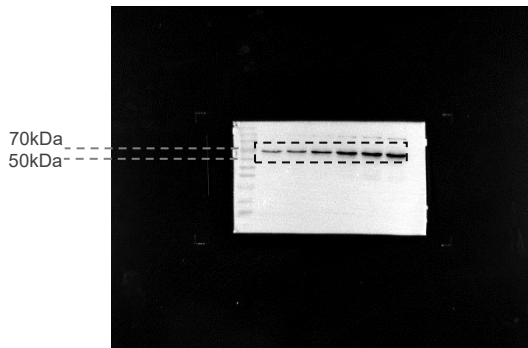

GBP9

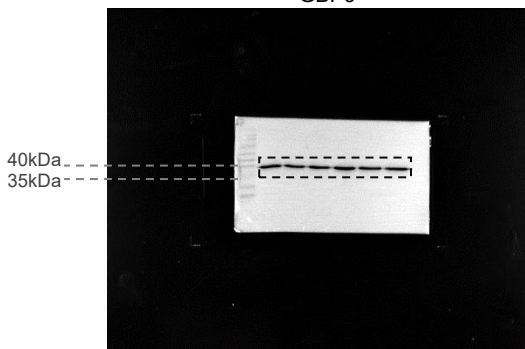

GAPDH

**Figure 3C**

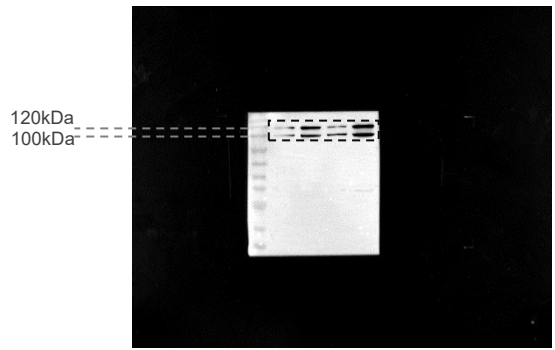

NLRP3

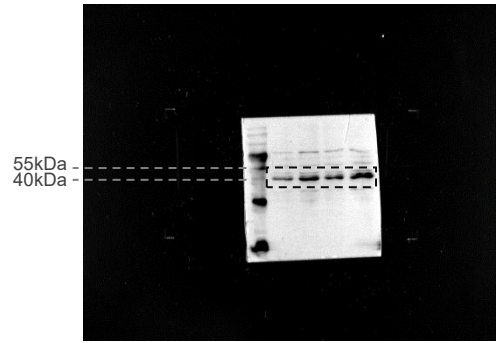

Caspase 1

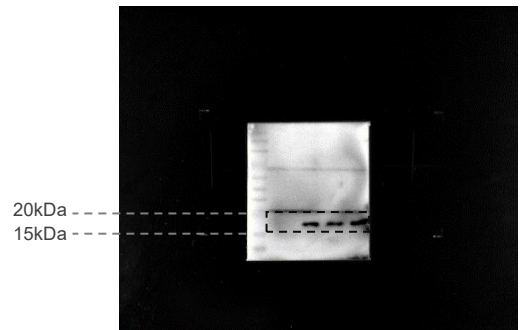

Cl-Caspase 1

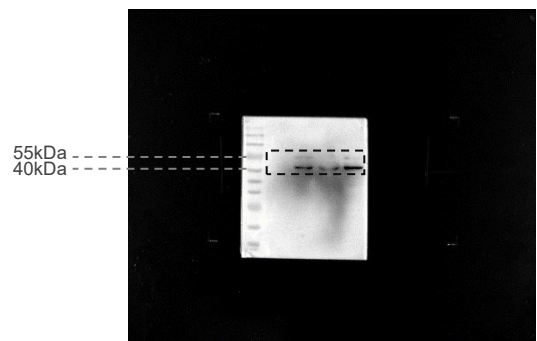

GSDMD-N

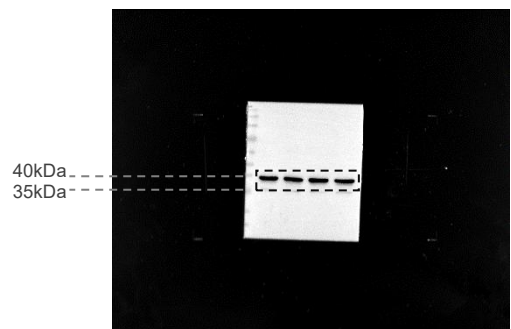

GAPDH

**Figure 3E**

120kDa  
100kDa

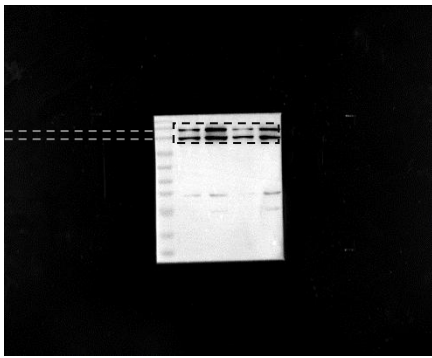

NLRP3

55kDa  
40kDa

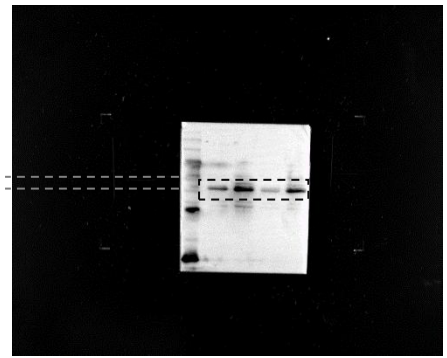

Caspase1

20kDa  
15kDa

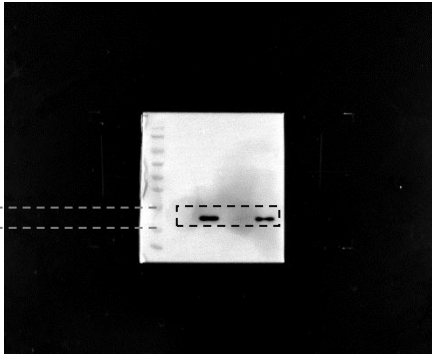

Cl-Caspase1

55kDa  
40kDa

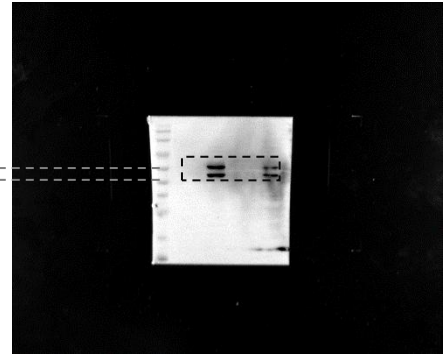

GSDMD-N

40kDa  
35kDa

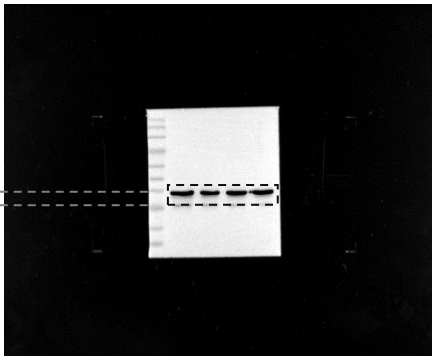

GAPDH

**Supplement Figure 3B**

55kDa  
40kDa

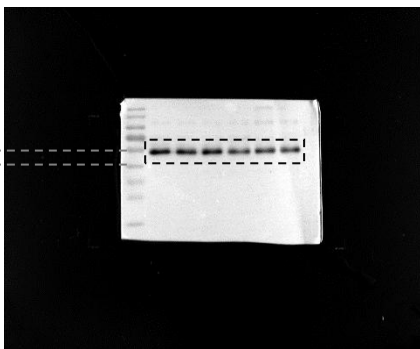

CRLF1

40kDa  
35kDa

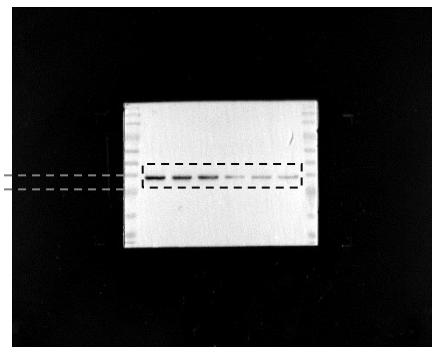

DHHC7

70kDa  
55kDa

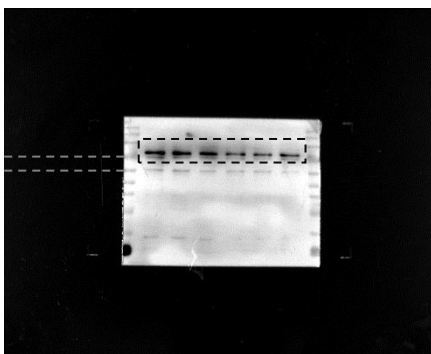

GBP9

40kDa  
35kDa

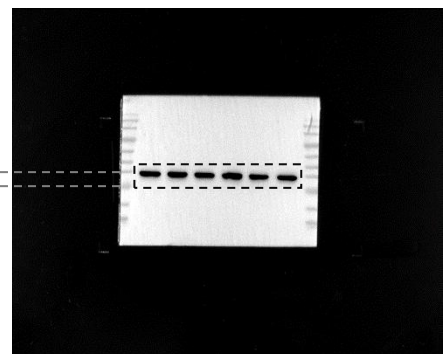

GAPDH

### Supplement Figure 3C

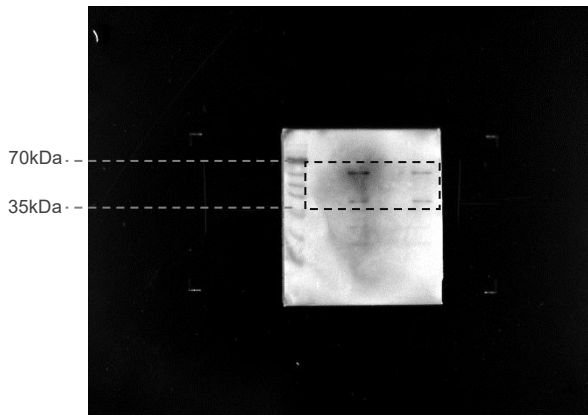

PLAM-GSDMD

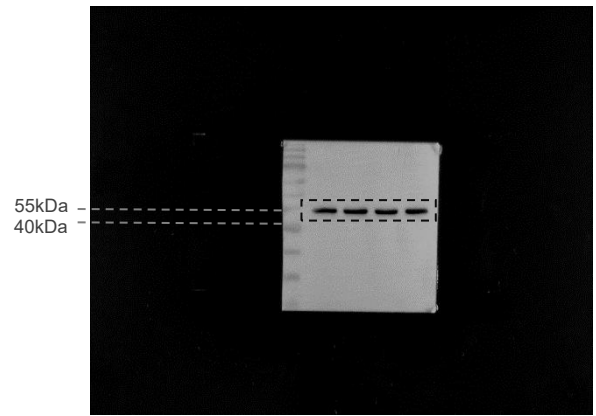

GSDMD

### Supplement Figure 3D

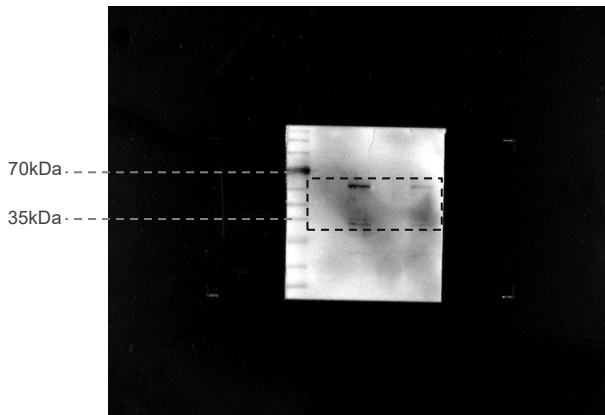

PLAM-GSDMD

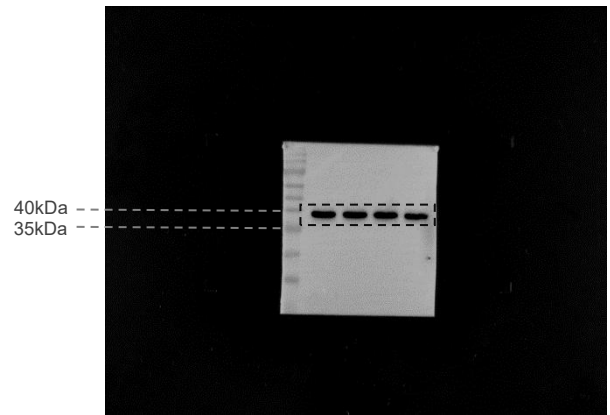

GAPDH

**Figure 4A**

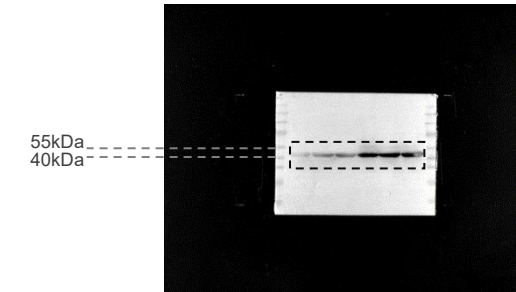

CRLF1

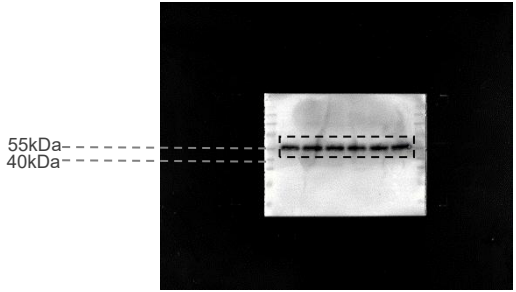

$\beta$ -actin

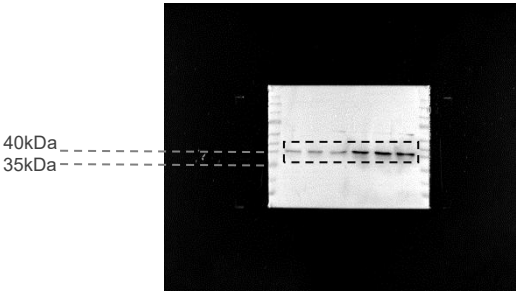

DHHC7

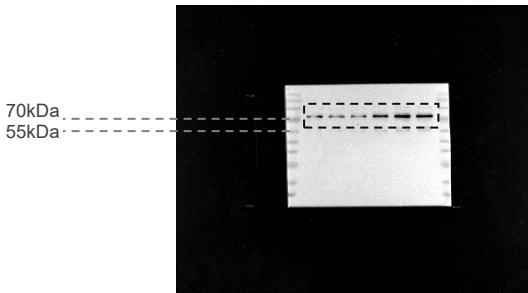

GBP9

**Figure 4B**

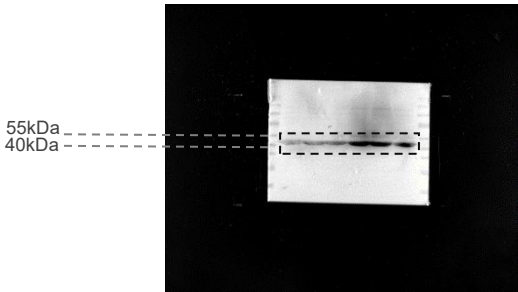

Caspase 1

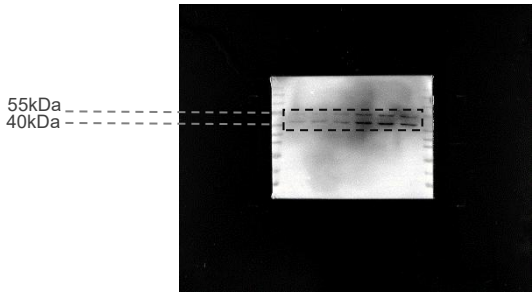

GSDMD-N

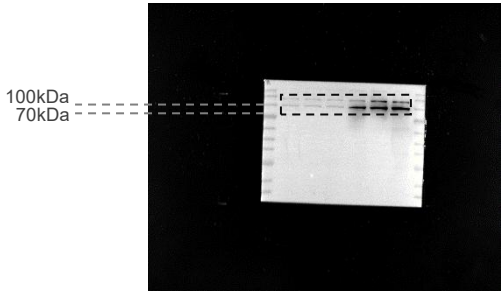

NLRP3

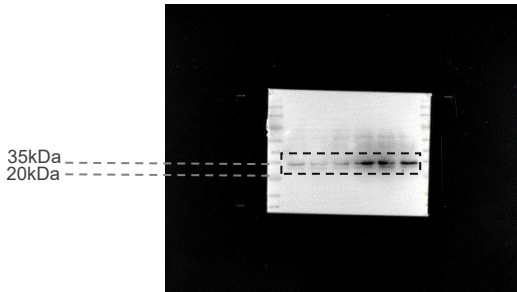

Cl-Caspase 1

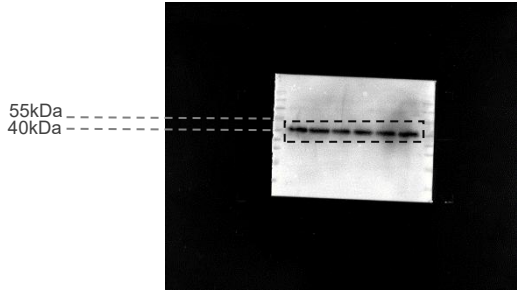

$\beta$ -actin

**Figure 4C**

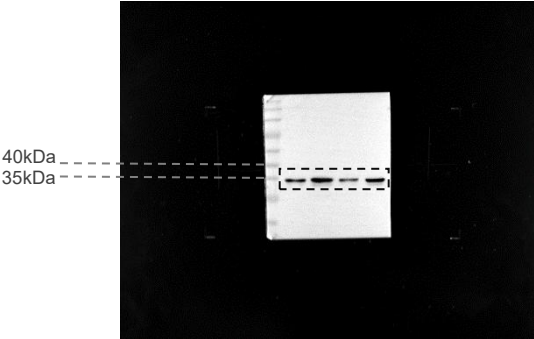

DHHC7

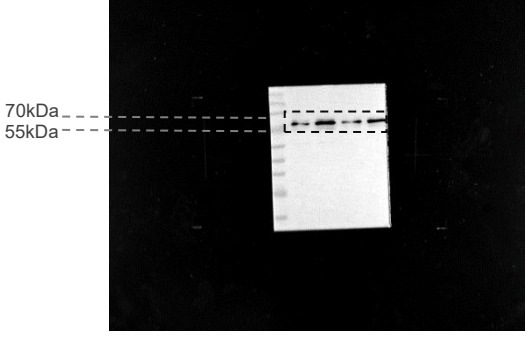

GBP9

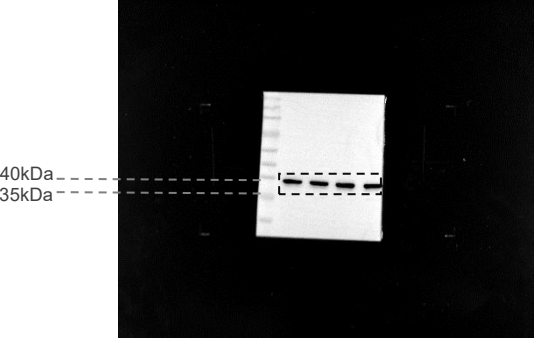

GAPDH

**Figure 4D**

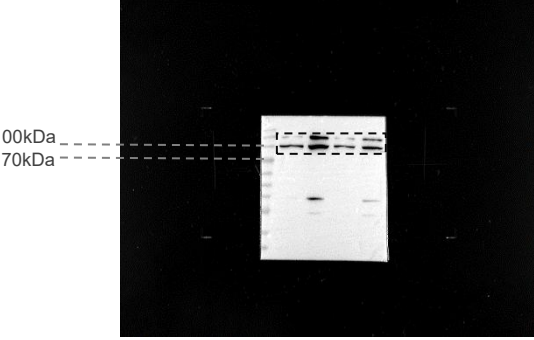

NLRP3

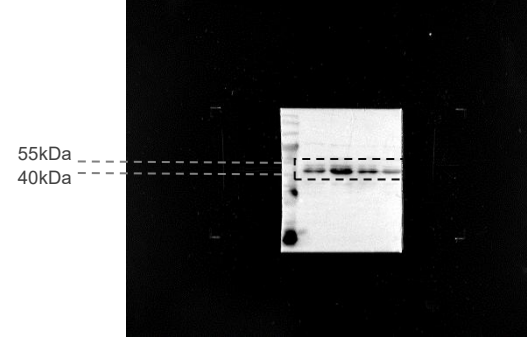

Caspase 1

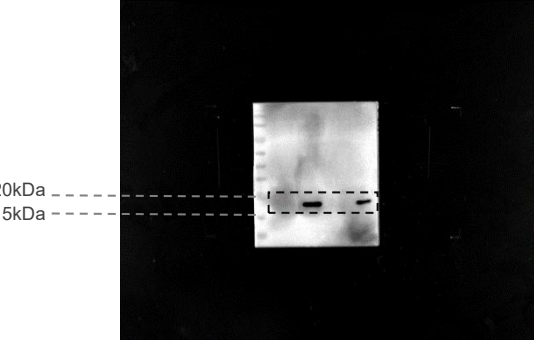

Cl-Caspase 1

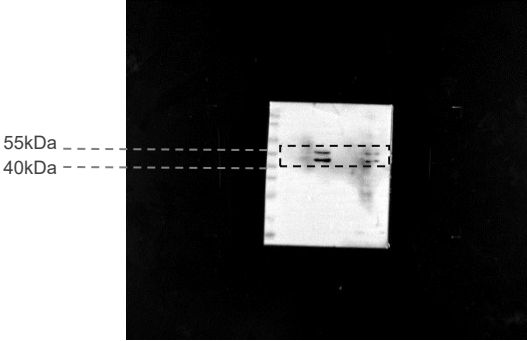

GSDMD-N

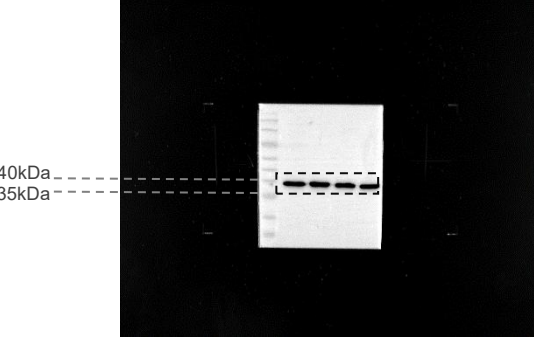

GAPDH

**Figure 5B**

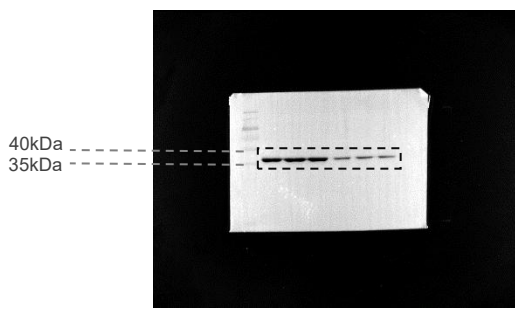

ALKBH5

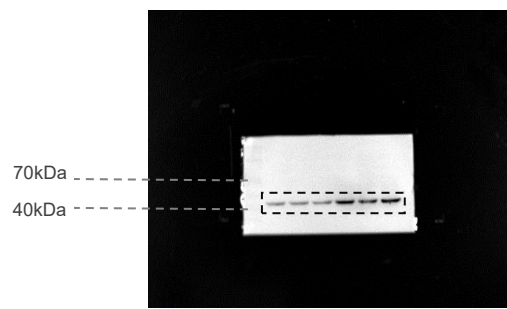

WTAP

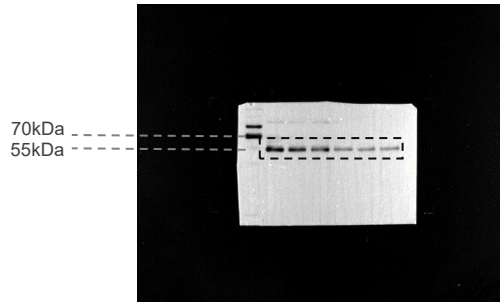

FTO

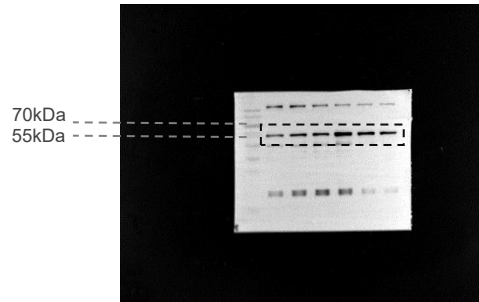

METTL3

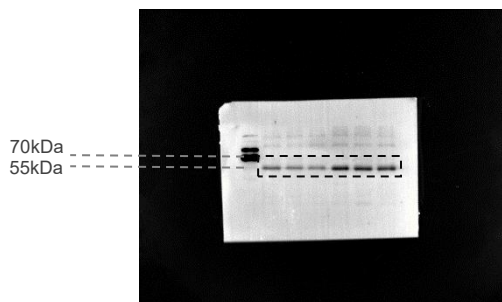

METTL14

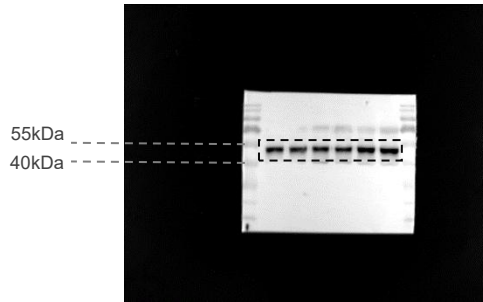

$\beta$ -actin

# Figure 5D

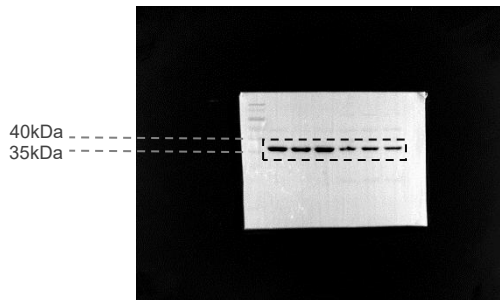

ALKBH5

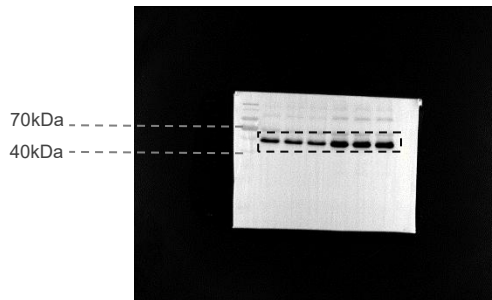

WTAP

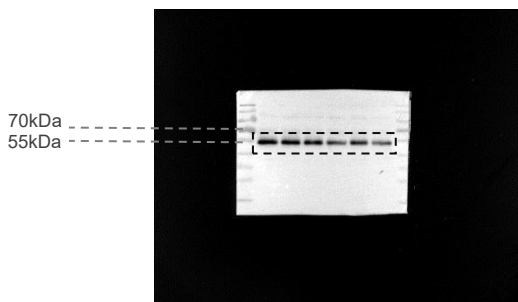

FTO

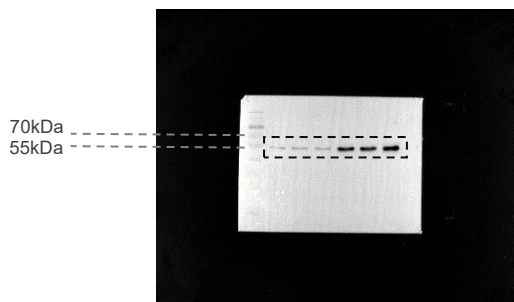

METTL3

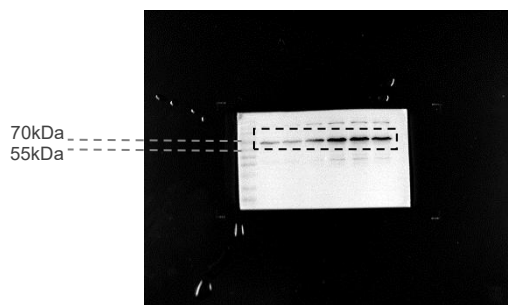

METTL14

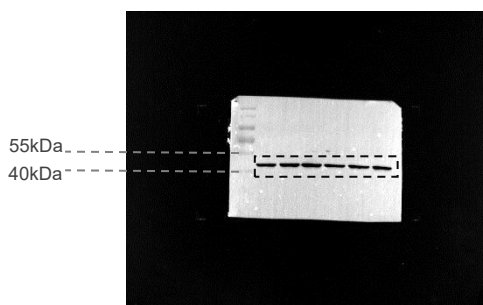

$\beta$ -actin

**Figure 5H**

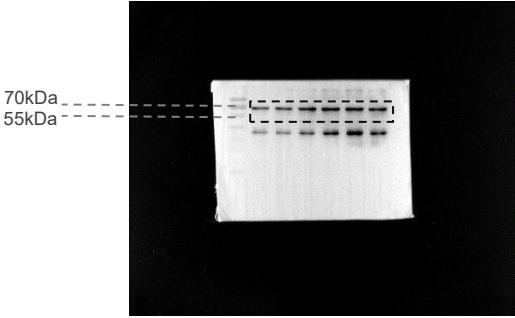

YTHDF1

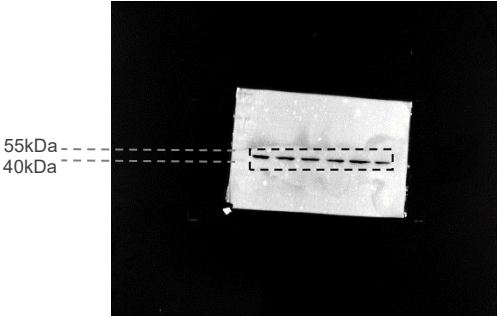

$\beta$ -actin

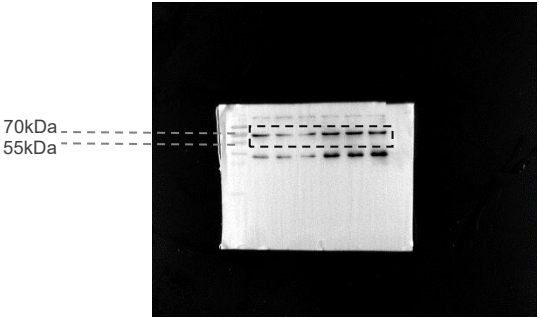

YTHDF2

**Figure 5I**

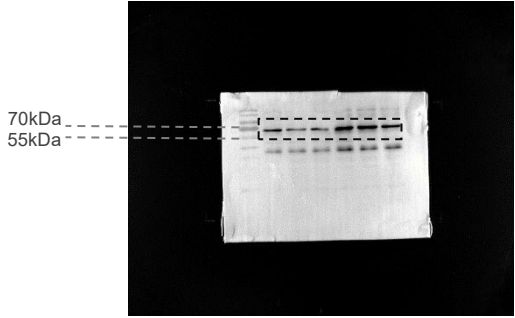

YTHDF1

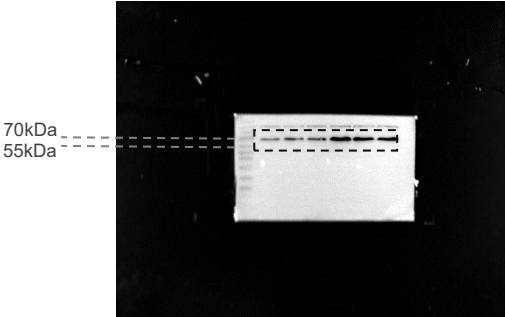

YTHDF2

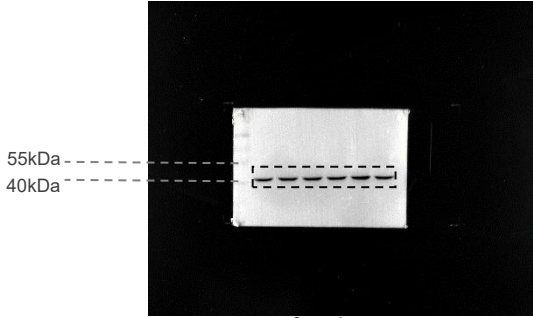

$\beta$ -actin

### Supplement Figure 4E

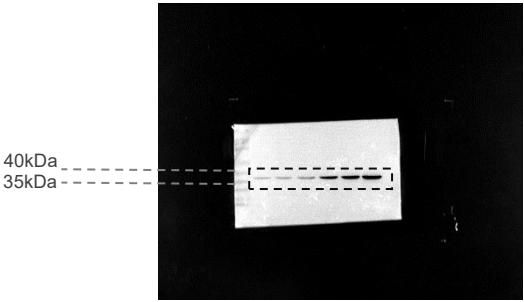

ALKBH5

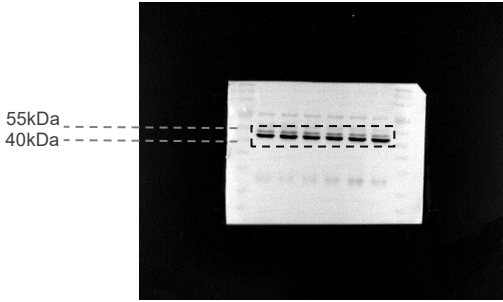

β-actin

### Supplement Figure 4F

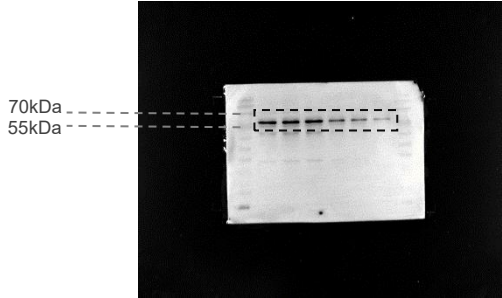

METTL3

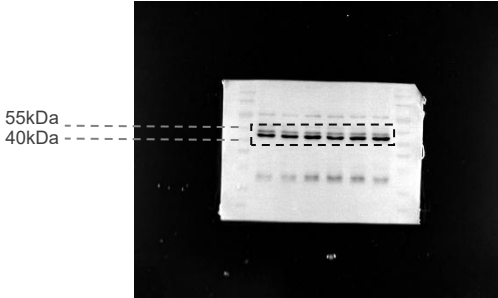

β-actin

### Supplement Figure 4G

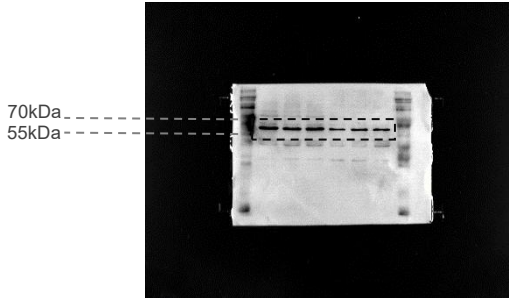

METTL14

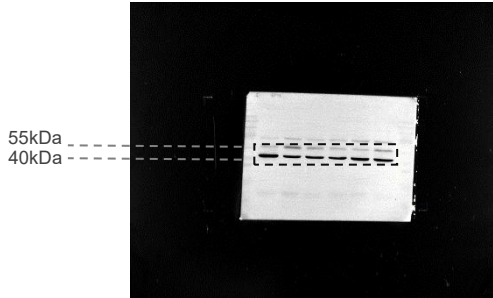

β-actin

# Supplement Figure 5L

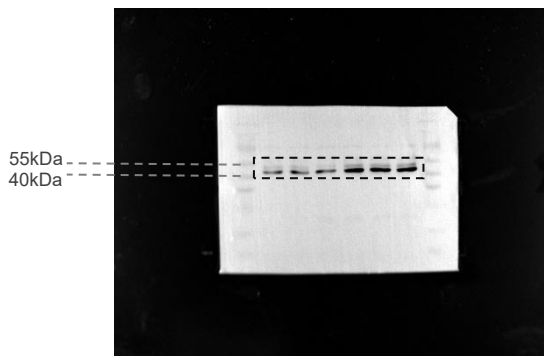

ALKBH5

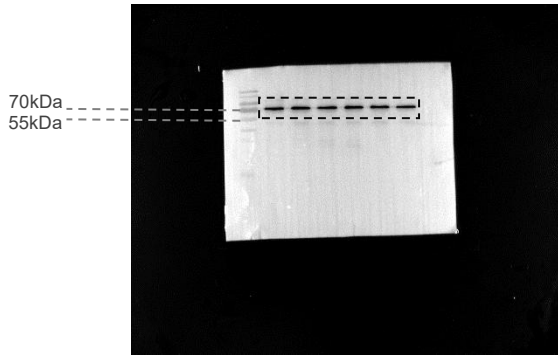

YTHDF1

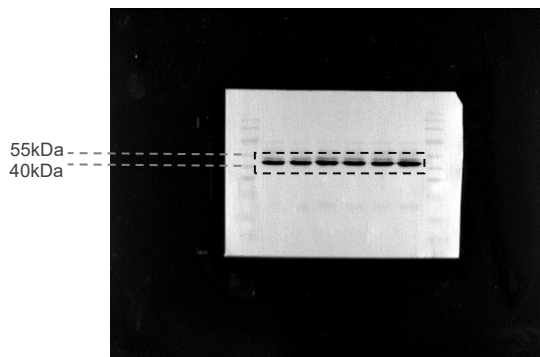

$\beta$ -actin

**Figure 6A**

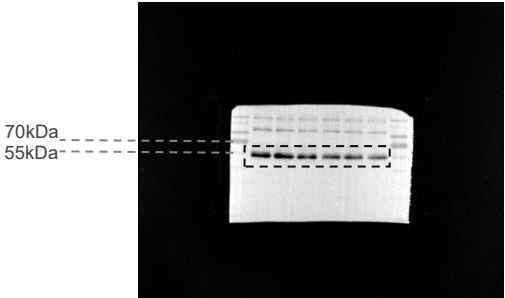

YTHDF1

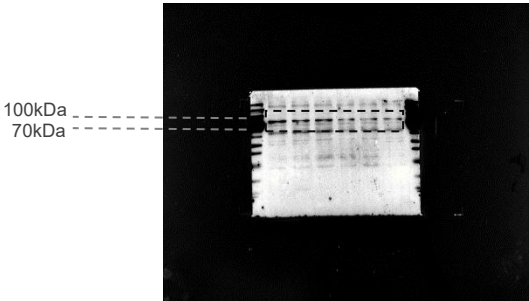

POSTN

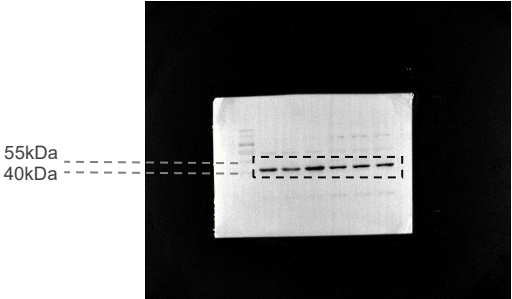

CRLF1

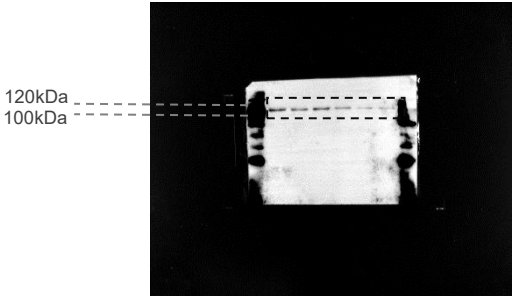

Collagen I

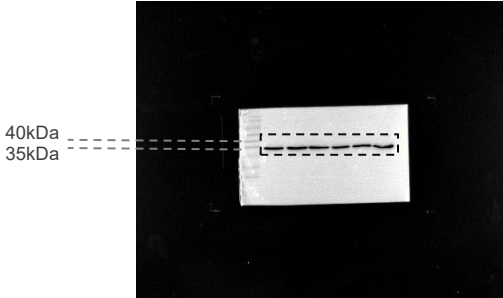

GAPDH
