# Supplementary material
Source: Research Square preprint supplement (doi:10.21203/rs.3.rs-9479527/v1)

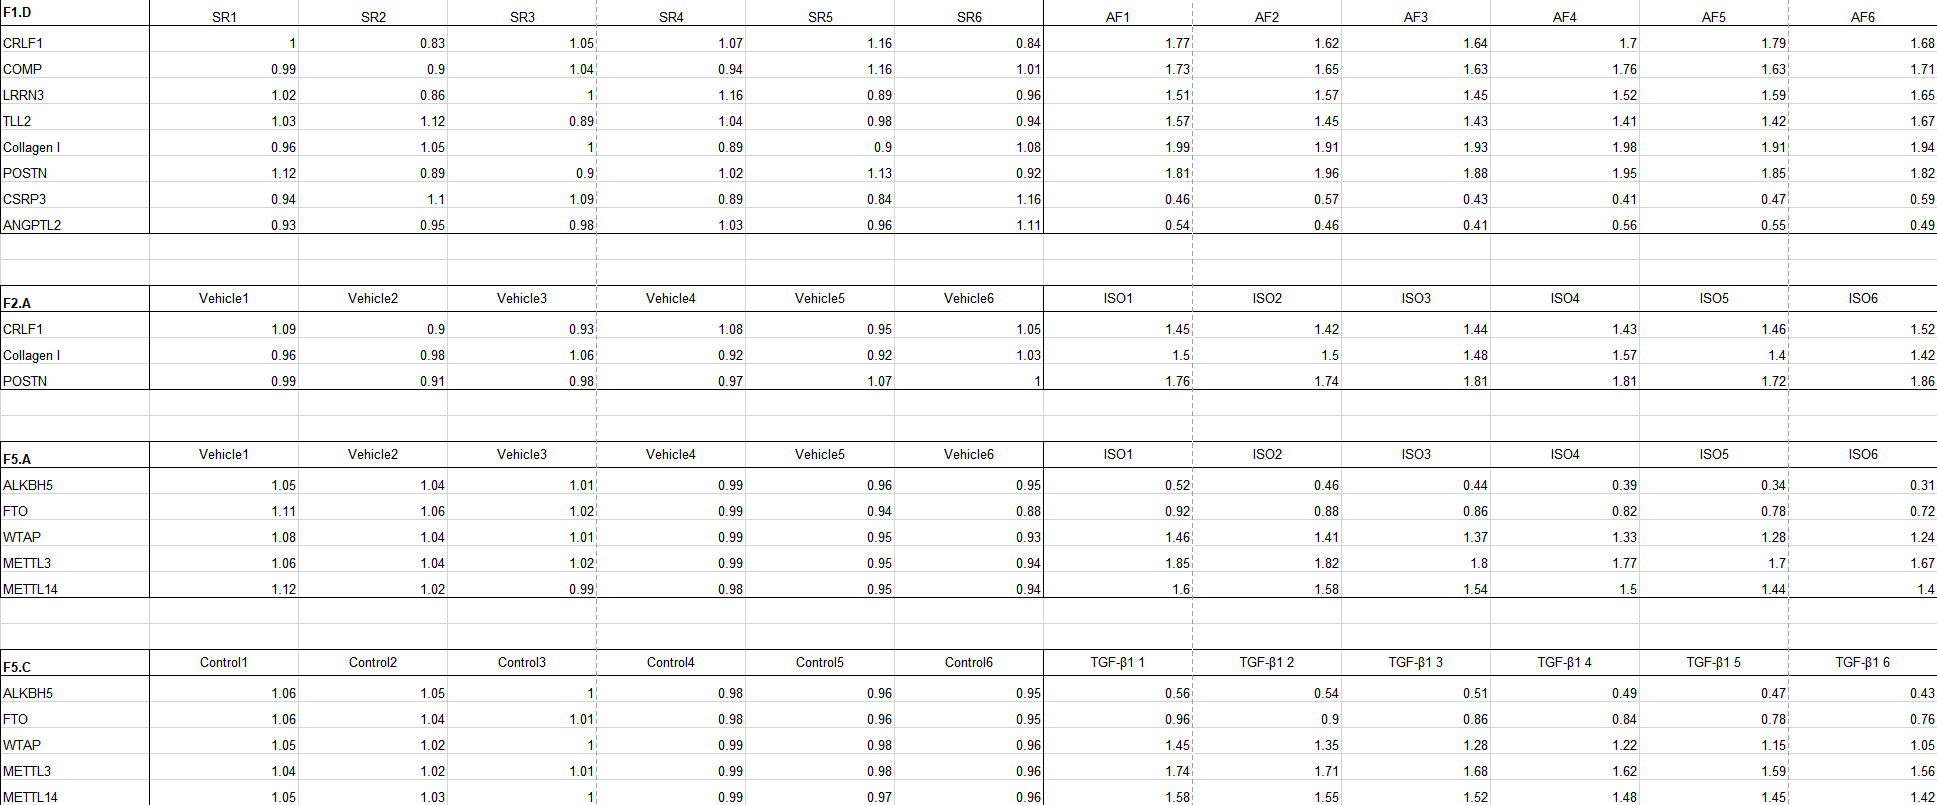


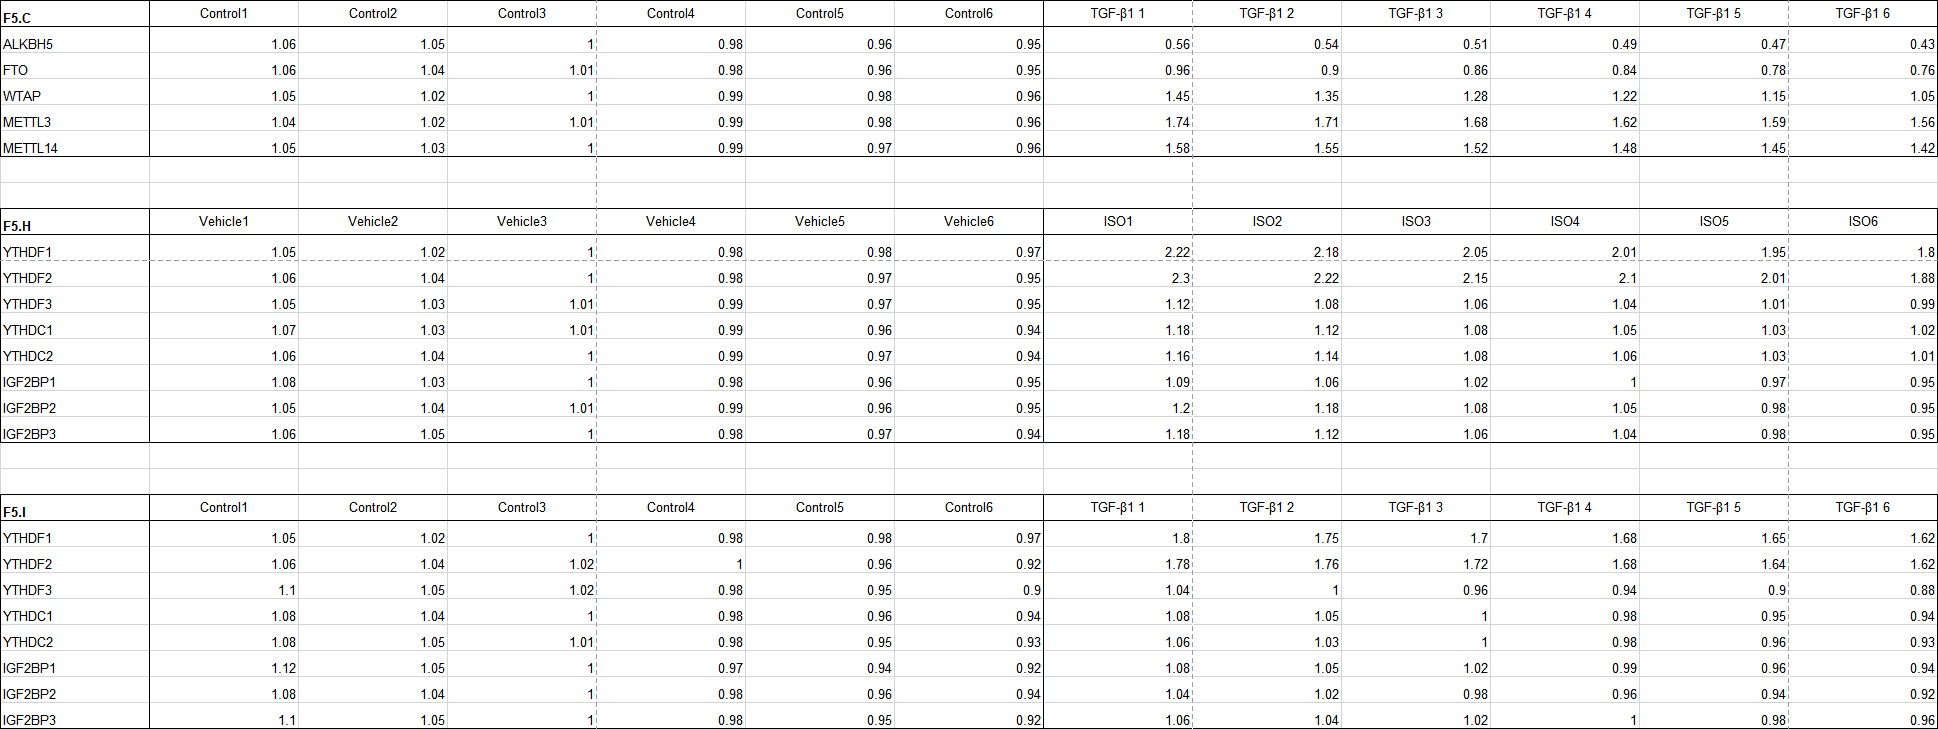


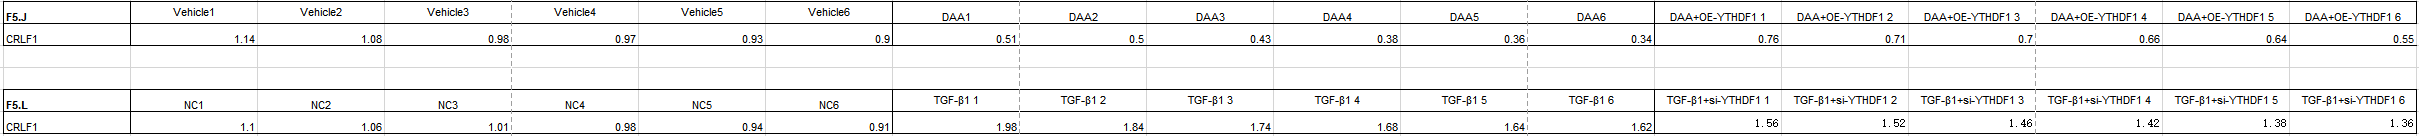


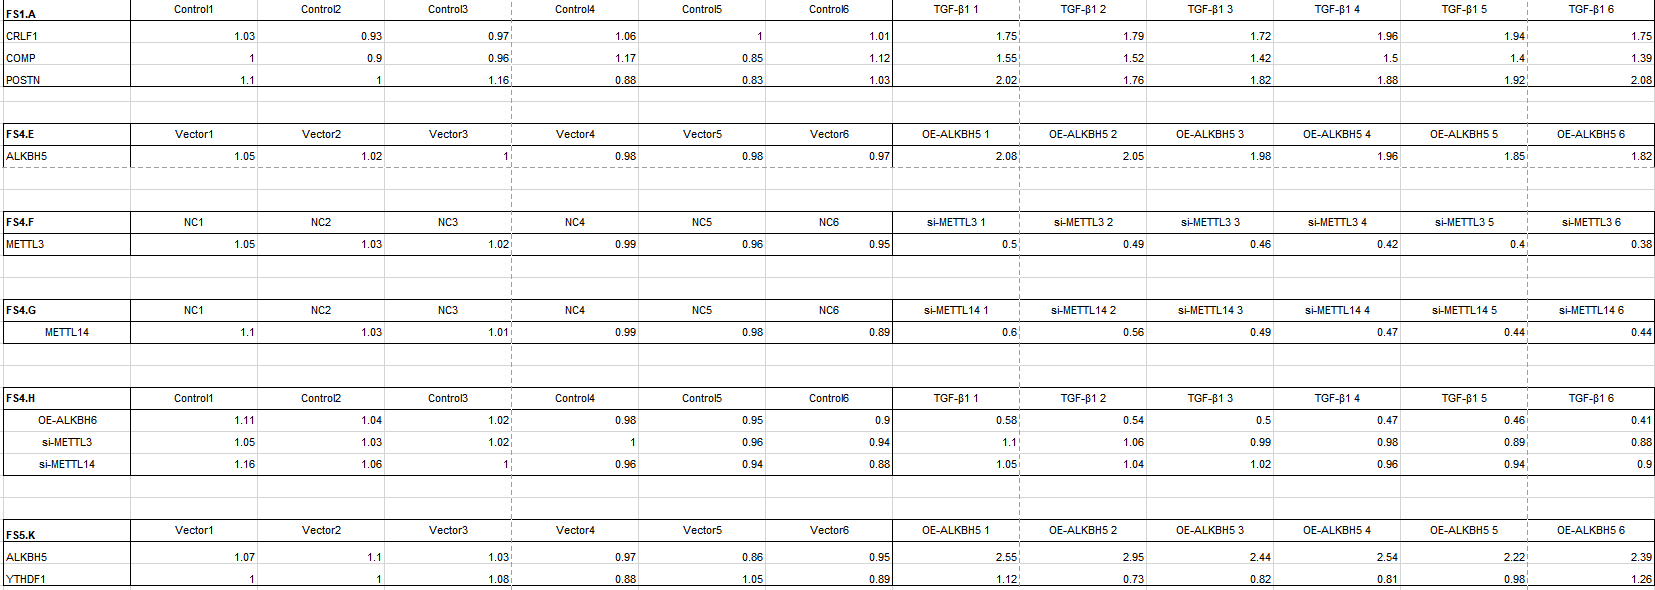

Supplement: Supplementary file 3 [file b4c7f4190486474bc6a2b477.docx]
